# Supplementary material for: Linking levee-building processes with channel avulsion: Geomorphic analysis for assessing avulsion frequency and style
Source: Copernicus journal article supplement (doi:10.5194/esurf-2021-92), 2021-12-02
Supplement: Supplementary file 1 [file esurf-2021-92-supplement-version2.pdf]

# Linking levee-building processes with channel avulsion: Geomorphic analysis for assessing avulsion frequency and channel reoccupation

JeongYeon Han<sup>1</sup> and Wonsuck Kim<sup>1</sup>

<sup>1</sup>Department of Earth System Sciences, Yonsei University, Seoul, 03722, Republic of Korea

*Correspondence to:* Wonsuck Kim (delta@yonsei.ac.kr)

This file contains supplementary figures describing:

**Figure S1.** The cumulative entrainment rate (E) of each grain size across the levee deposit for Test 2.

**Figure S2.** The profiles of (a) overflow depth and (b) overflow velocity across the distance from the river bank for Test 3.

**Figure S3.** The normalized ratio of differences in total suspended sediment concentration (SSC) of all grain sizes between Tests 1 and 3 ( $\left| \frac{\text{total } SSC_1 - \text{total } SSC_3}{\text{total } SSC_1} \right|$ ).

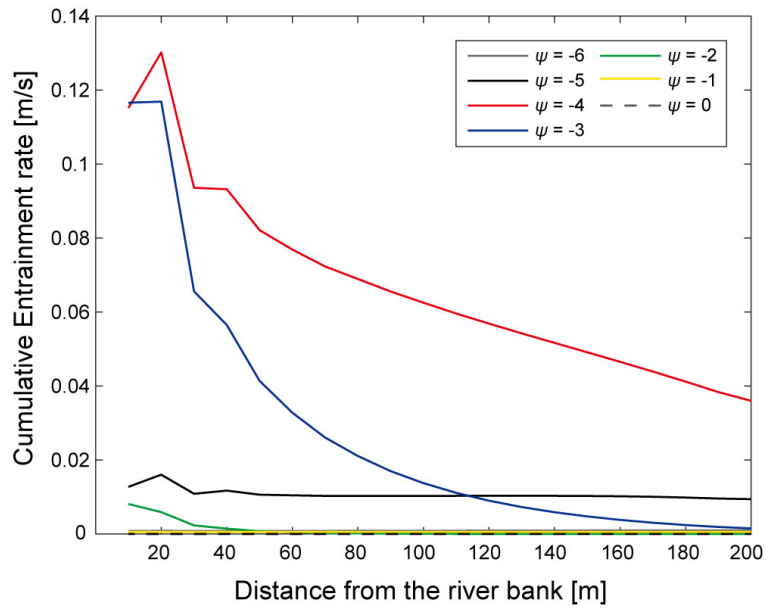

Supplementary Figure 1. The cumulative Entrainment rate (E) of each grain size across the levee deposit for Test 2.

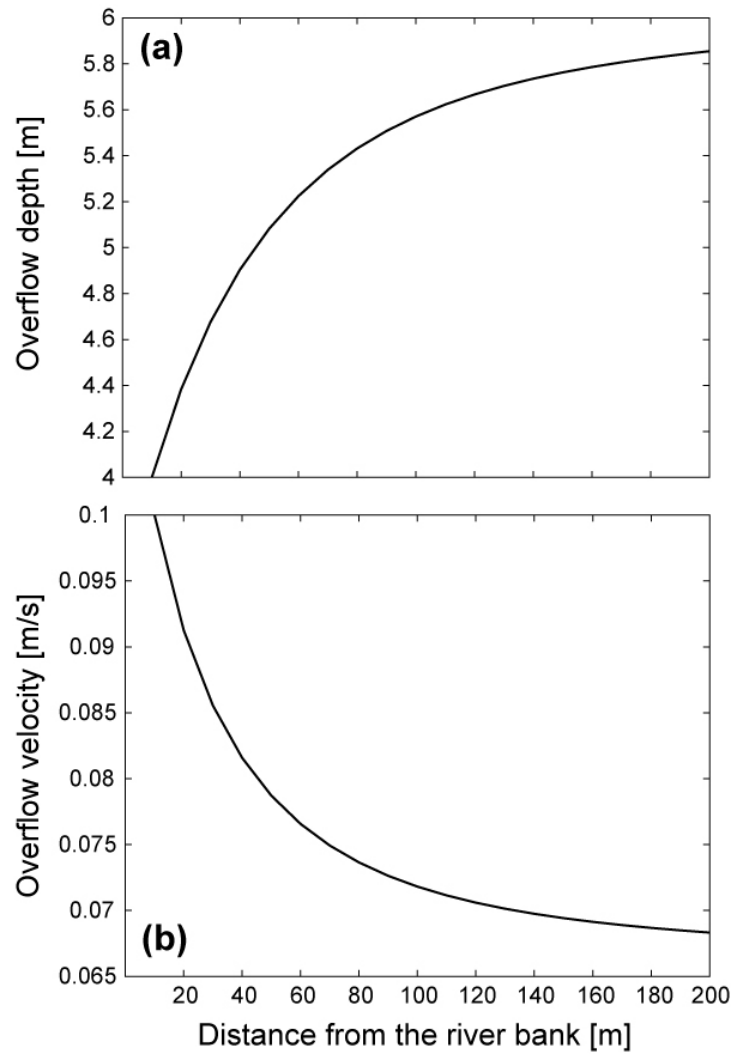

**Supplementary Figure 2. The profiles of (a) overflow depth and (b) overflow velocity across the distance from the river bank for Test 3.**

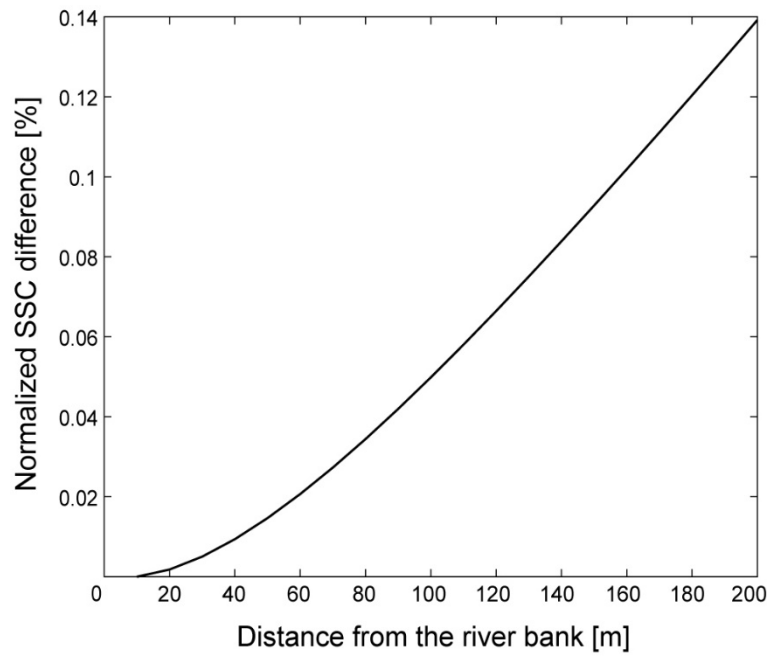

**Supplementary Figure 3. The normalized ratio of differences in total suspended sediment concentration (SSC) of all grain sizes between Tests 1 and 3 ( $\left(\frac{total\ SSC_1 - total\ SSC_3}{total\ SSC_1}\right)$ ).**
